# Supplementary material
Source: PubMed Central journal article supplement (PMC3137042)
Supplement: supp_M111.236273_jbc.M111.236273-1.pdf [file supp_M111.236273_jbc.M111.236273-1.pdf]

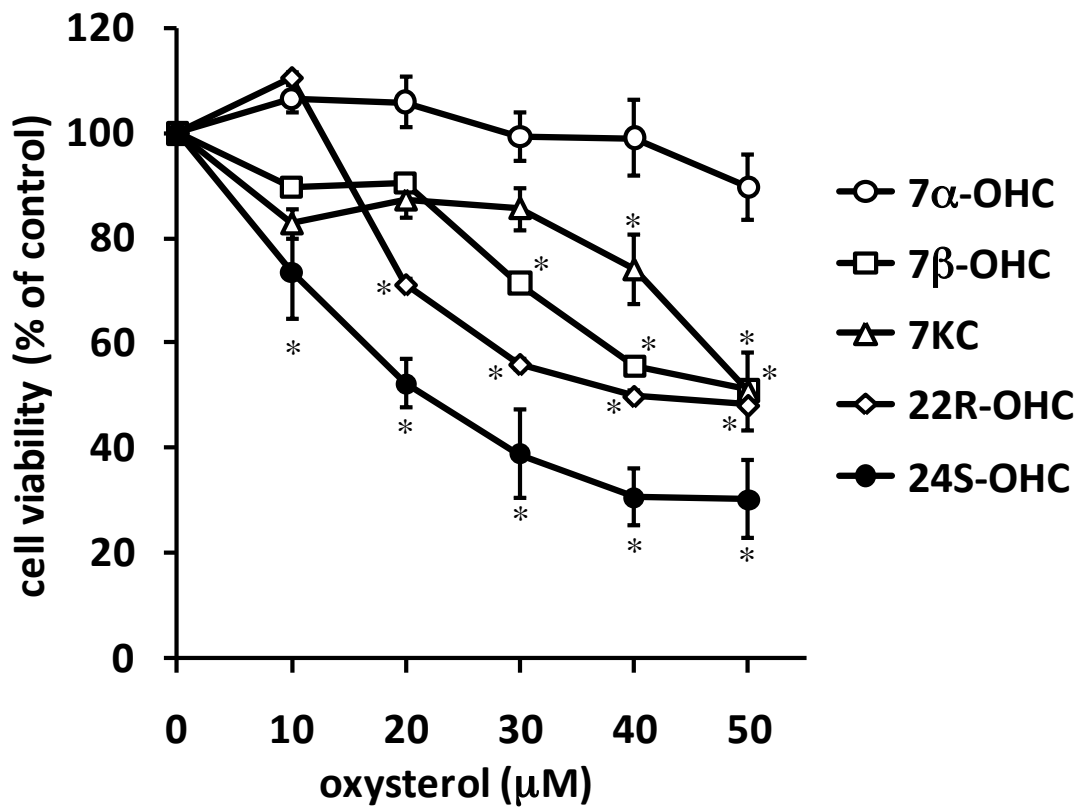

Fig. S-1. The effects of 24S-OHC and other oxysterols on the viability of SH-SY5Y cells. SH-SY5Y cells were treated with various concentrations of oxysterols for 24 h, and the viability was measured by MTT assay. \* $p < 0.01$ , when compared with vehicle control (without 24S-OHC). 7KC: 7-ketocholesterol

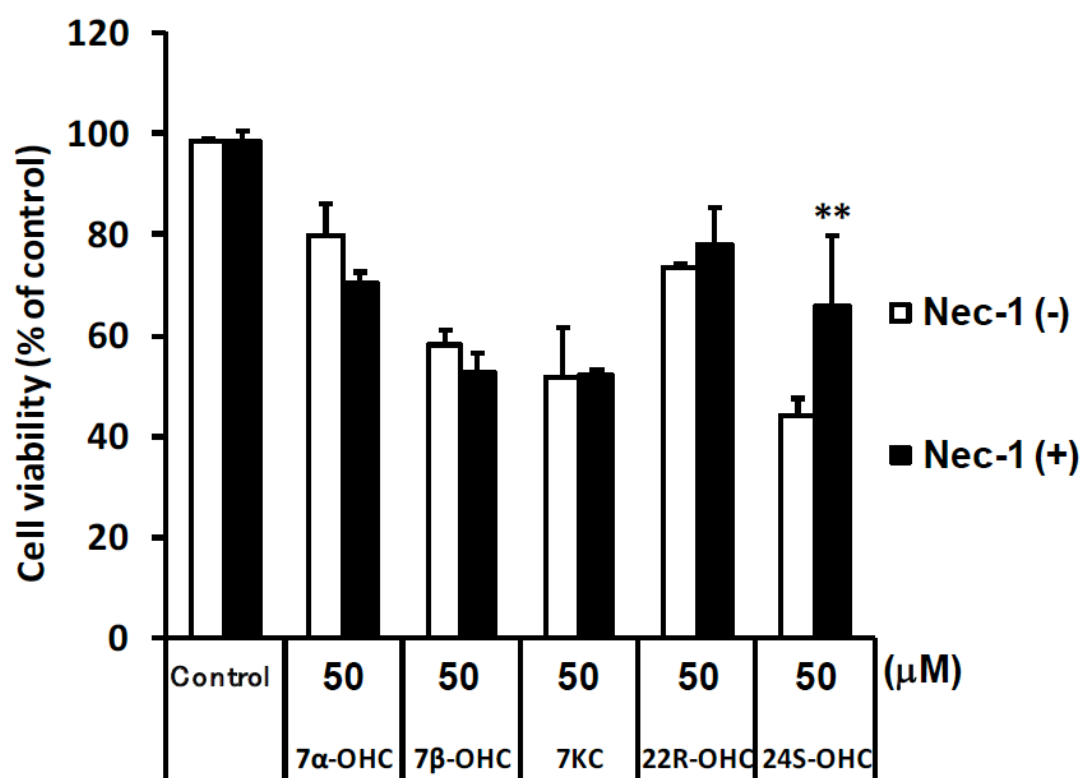

Fig. S-2. The effects of Nec-1 against cell death induced by oxysterols. SH-SY5Y cells were exposed to oxysterols in the absence or presence of Nec-1 for 24 h, and the viability was measured by LDH assay.  $**p < 0.01$ , when compared with vehicle control (without Nec-1).

### S-3

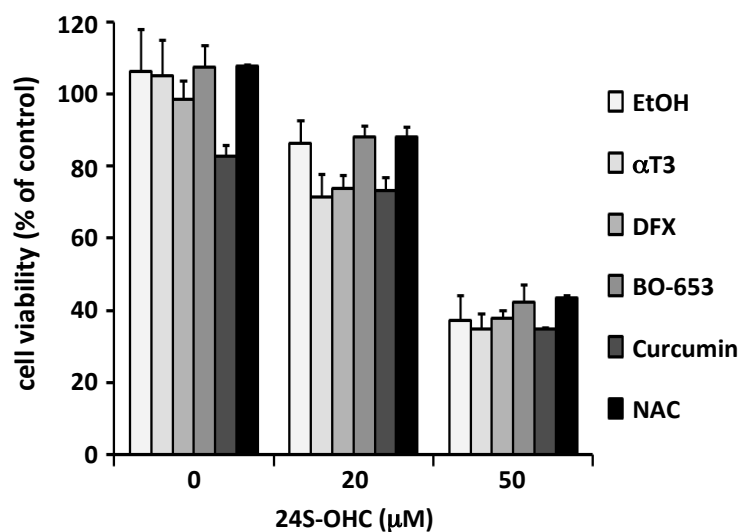

### S-4

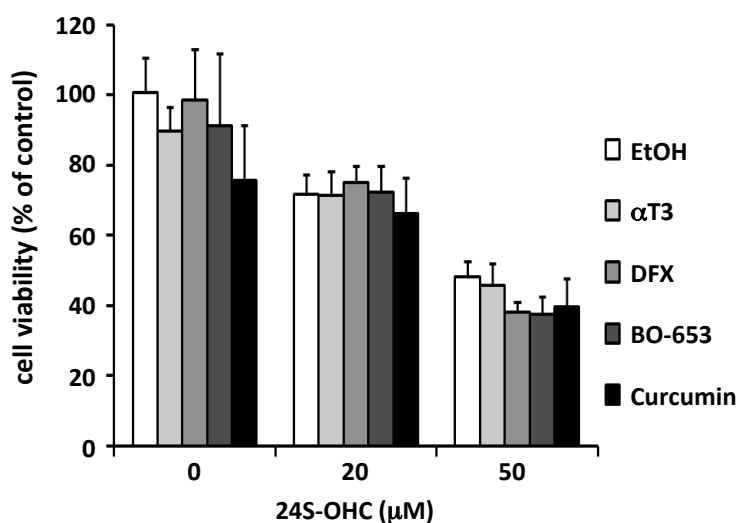

Fig. S-3 and S-4. Effects of antioxidants against 24S-OHC toxicity in SH-SY5Y cells. (S-3) The cells were treated with various antioxidants for 24 h. After each treatment, the cells were treated with 24S-OHC for 24 h, and the viability was measured by MTT assay. (S-4) The cells were simultaneously treated with various antioxidants and 24S-OHC for 24 h, and the viability was measured by MTT assay. Concentrations of antioxidants were as follows:  $\alpha$ -tocotrienol ( $\alpha$ T3), 10  $\mu$ M; deferoxamine (DFX), 10  $\mu$ M; BO-653, 10  $\mu$ M; curcumin, 10  $\mu$ M; and NAC, 2 mM.
